# Supplementary material for: Newly Discovered Alleles of the Tomato Antiflorigen Gene SELF PRUNING Provide a Range of Plant Compactness and Yield
Source: MDPI journal article supplement (doi:10.3390/ijms23137149), 2022-06-28
Supplement: s1 [file s1]

## Supplementary Materials

### Newly discovered alleles of the tomato antiflorigen gene *SELF PRUNING* provide a range of plant compactness and yield

Min-Sung Kang<sup>1,\*</sup>, Yong Jun Kim<sup>1,\*</sup>, Jung Heo<sup>1</sup>, Sujeevan Rajendran<sup>1</sup>, Xingang Wang<sup>2</sup>, Jong Hyang Bae<sup>3</sup>, Zachary Lippman<sup>2,4</sup>, and Soon Ju Park<sup>1,†</sup>

<sup>1</sup> Department of Biological Science and Institute of Basic Science, Wonkwang University, Iksan 54538, South Korea

<sup>2</sup> Cold Spring Harbor Laboratory, Cold Spring Harbor, NY 11724, USA

<sup>3</sup> Department of Horticulture Industry, Wonkwang University, Iksan 54538, South Korea

<sup>4</sup> Howard Hughes Medical Institute, Cold Spring Harbor Laboratory, Cold Spring Harbor, NY, USA

\* M.K. and Y.J.K. contributed equally to this work.

† Correspondence should be addressed to S.J.P. (sjpark75@wku.ac.kr)

This PDF file includes

Figures S1 to S2

Legends of Tables S1 to S8

Figure S1

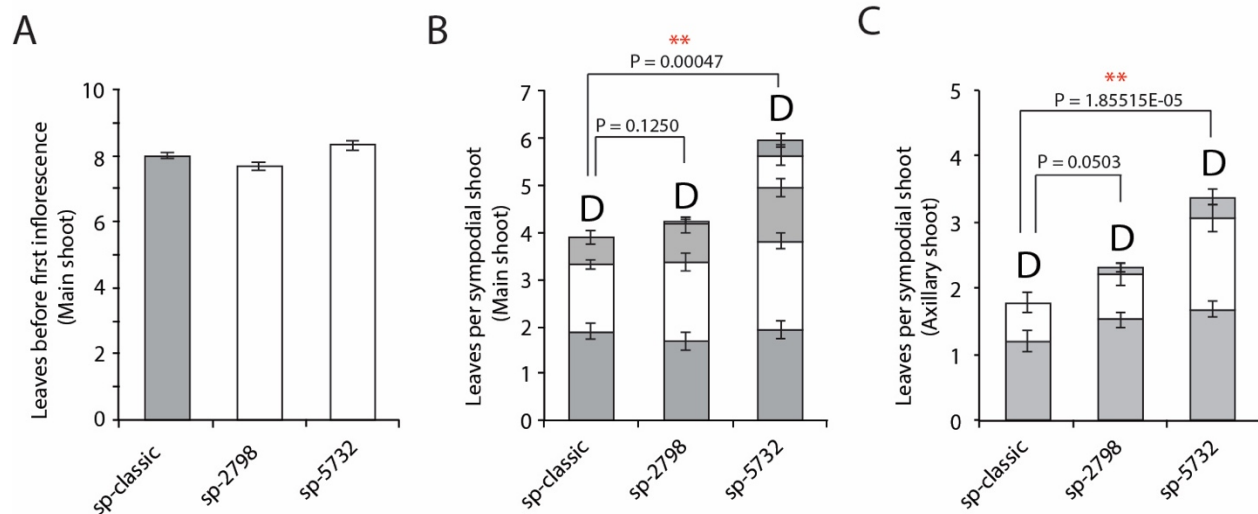

**Supplementary Figure S1.** Comparison of leaf numbers on primary and sympodial shoots among BC3F3 generations of *sp* alleles: (A-C). Quantification and comparison of primary-shoot flowering time (A) and sympodial-shoots initially produced by the primary shoot (B) and axillary shoot (C) in *sp* alleles. Statistic analyses were done with at least 16 biological replicates for each genotype. *P* values were determined via two-tailed, two-sample t-test;  $**P < 0.01$ . CCs of *sp* alleles backcrossed with cv M82 more than four times.

Figure S2

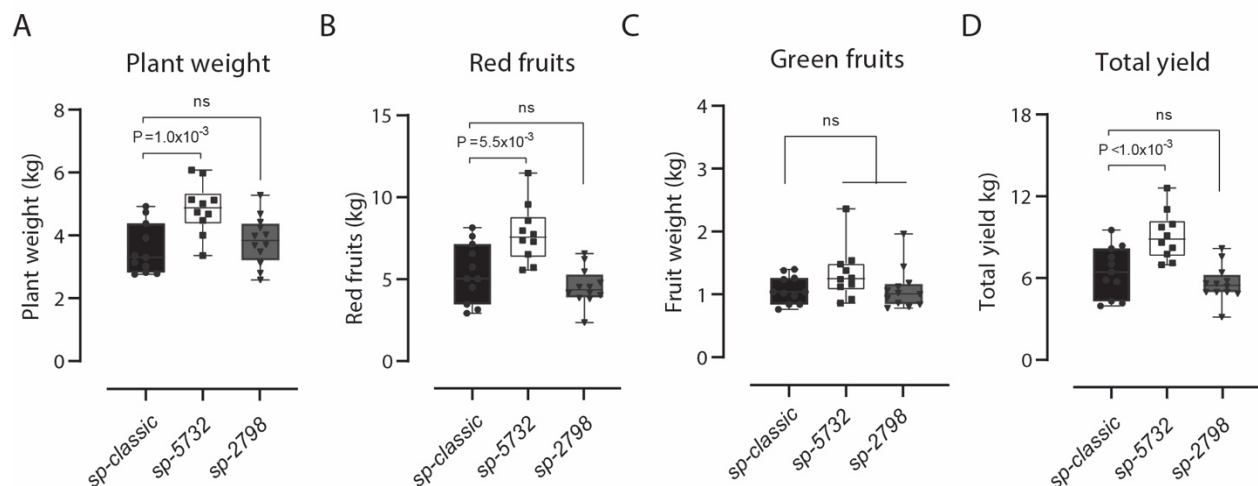

**Supplementary Figure S2.** Quantifications and comparisons of tomato yields among *sp* alleles at the second field trial:

(A-D). Statistical comparisons of mean values ( $\pm$ s.e.m.) for plant weight (A), red fruit weight (B), green fruit

weight (**D**), and total yield (**D**) from *sp-classic* as the control (black boxes), *sp-2798* (gray boxes), and *sp-5732* (white boxes). *P* values was determined via two-tailed, two-sample t-test; ns, no significant difference. Statistical comparisons were conducted with more than 10 biological replicates.

**Table S1.** List of Core Collection accessions selected by *sp-classic* genotyping marker

**Table S2.** Genotyping data of *sp* alleles using resequencing data of 588 accessions

**Table S3.** DEGs identified between *SP* and *sp-classic* in TM

**Table S4.** DEGs identified between *SP* and *sp-classic* in SYM

**Table S5.** DEGs identified between *SP* and *sp-classic* in both TM and SYM

**Table S6.** Enriched GO terms of total, TM, SYM, and single-/co-regulated DEGs

**Table S7.** Gene list categorized as developmental process and transcription enriched GO term analysis

**Table S8.** Information of used primers in this study
